RESEARCH ARTICLE

# Real-World Patterns of *EGFR* Testing and Treatment with Erlotinib for Non-Small Cell Lung Cancer in the United States

Lindsey Enewold<sup>1\*</sup>, Anish Thomas<sup>2</sup>

**1** Healthcare Assessment Research Branch, Healthcare Delivery Research Program, Division of Cancer Control and Population Sciences, National Cancer Institute, Bethesda, MD, United States of America,

**2** Thoracic and Gastrointestinal Oncology Branch, Center for Cancer Research, National Cancer Institute, Bethesda, MD, United States of America

\* [lindsey.enuewold@nih.gov](mailto:lindsey.enuewold@nih.gov)

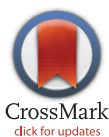

OPEN ACCESS

**Citation:** Enewold L, Thomas A (2016) Real-World Patterns of *EGFR* Testing and Treatment with Erlotinib for Non-Small Cell Lung Cancer in the United States. PLoS ONE 11(6): e0156728. doi:10.1371/journal.pone.0156728

**Editor:** Fan Yang, Peking University People Hospital, CHINA

**Received:** September 25, 2015

**Accepted:** May 18, 2016

**Published:** June 13, 2016

**Copyright:** This is an open access article, free of all copyright, and may be freely reproduced, distributed, transmitted, modified, built upon, or otherwise used by anyone for any lawful purpose. The work is made available under the [Creative Commons CC0](https://creativecommons.org/licenses/by/4.0/) public domain dedication.

**Data Availability Statement:** The Patterns of Care Data are considered a limited data set and are available via request from the National Cancer Institute (NCI) for researchers who meet the criteria for access to confidential data. For more information on how the data may be obtained please contact Dr. Linda Harlan ([lh50w@nih.gov](mailto:lh50w@nih.gov)).

**Funding:** This work was supported by the Intramural Research Program of the National Cancer Institute and National Cancer Institute contracts: HHSN261201000024C, HHSN261201000025C, HHSN261201000032C, HHSN261201000027C, HHSN261201000026C, HHSN261201000140C,

## Abstract

Despite being the basis of one of the most effective interventions in lung cancer, little is known about the patterns of epidermal growth factor receptor (*EGFR*) mutation testing in the general population. We assessed the frequencies and determinants of *EGFR* testing and erlotinib treatment among a population-based sample. A random sample (n = 1,358) of patients diagnosed in 2010 with histologically-confirmed NSCLC, as reported to the Surveillance Epidemiology and End Results (SEER) program, had their medical records abstracted and treating physicians queried. Logistic regression was used to identify factors associated with *EGFR* testing and erlotinib treatment. Survival was examined using Cox proportional hazards regression. The frequency of *EGFR* testing was 16.8% overall and 22.6% for stage IV adenocarcinoma patients. Given an *EGFR* mutation, 33.6% of all patients and 48.3% of stage IV patients received erlotinib. Among stage IV patients, increased age, Medicaid/no/unknown insurance status, death within 2 months of diagnosis and comorbidity were inversely associated with *EGFR* testing; erlotinib treatment was less likely among smokers and patients with non-adenocarcinomas. *EGFR*-mutation was associated with improved survival, albeit only among stage IV adenocarcinomas. Less than a quarter of NSCLC patients diagnosed in 2010 received *EGFR* testing and less than half of the patients with *EGFR*-mutant stage IV tumors received erlotinib. Significant disparities were observed in *EGFR* mutation testing by health insurance status, comorbidity and age. A national strategy is imperative to ensure that resources and processes are in place to efficiently implement molecular testing of cancer.

## Introduction

Lung cancer is the leading cause of cancer-related mortality in the United States [1]. Non-small cell lung cancer (NSCLC), which constitutes over 80% of all lung cancer, is most often diagnosed at advanced stages and, as such, is largely treated with systemic therapy. Although

HHSN261201000037C, HHSN261201000033C, HHSN261201000034C, HHSN261201000035C, HHSN261201000029C, HHSN261201000031C, HHSN261201000028C, and HHSN261201000030C.

**Competing Interests:** The authors declare that they have no conflict of interest. This article was produced by employees of the US government as part of their official duties and, as such, is in the public domain in the United States of America. The content is solely the responsibility of the authors and does not necessarily represent the official views of the National Cancer Institute or the National Institutes of Health.

distinct histological subtypes of NSCLC have been recognized since the 1950s, NSCLC was considered a single disease entity in terms of selection of treatment options until the mid-2000s [2].

It has since been recognized that a subgroup (10–28%) of NSCLCs have mutations in the epidermal growth factor receptor (*EGFR*) gene that predict sensitivity to EGFR tyrosine kinase inhibitors (TKIs), such as gefitinib, erlotinib or afatinib [3–6]. Clinical trials have consistently demonstrated response rates of over 60% with EGFR TKIs in patients with *EGFR*-mutant NSCLC [7–10]. Marked improvements in progression-free survival have also been demonstrated with EGFR TKIs over first-line chemotherapy, albeit with no overall survival benefit potentially due to patient crossover from chemotherapy to EGFR TKI [7–10]. Erlotinib, afatinib and gefitinib are currently approved in the United States for treatment of patients with advanced, *EGFR*-mutant NSCLC tumors.

The observation that tumor genotype affects treatment response has transformed the recommended care of patients with NSCLC; practice guidelines recommend molecular testing of tumor specimens to inform treatment decisions [11–13]. Both the National Comprehensive Cancer Network and American Society of Clinical Oncology guidelines recommended *EGFR* mutation testing for NSCLCs, particularly for advanced, non-squamous tumors [14–15]. However, barriers to molecular testing have been identified [16] and the patterns of *EGFR* mutation testing and erlotinib treatment in the general population have not previously been described.

The primary aims of this study were to estimate the frequency and determinants of *EGFR* mutation testing and erlotinib treatment among a population-based sample of NSCLC patients. All stages of NSCLC were studied, in order to gain broad insights into community practice. A secondary aim was to determine if *EGFR* mutation status and/or receipt of erlotinib were associated with survival. In order to carry out these research aims, we analyzed data from the most recent National Cancer Institute (NCI) Patterns of Care (POC) lung cancer study. The included participants were diagnosed in 2010 with histologically confirmed NSCLC and were ascertained through the Surveillance, Epidemiology and End Results (SEER) program. When these patients were diagnosed, based on the FDA labeling, erlotinib was the preferred EGFR TKI. Although it was not until 2011 that professional guidelines recommended *EGFR* testing, the utility of *EGFR* testing to predict EGFR TKI sensitivity and the benefits of EGFR TKIs in *EGFR*-mutant tumors were well recognized in 2010 [6,7,17–19]. We believe that the findings described herein provide insights into the early dissemination of NSCLC management practices and could inform ongoing efforts to improve uptake of molecular testing in the general population.

## Materials and Methods

### Data source

A NCI POC study was conducted among NSCLC patients who were ascertained through the SEER program. The SEER program consists of multiple population-based registries that collect data, mainly from hospital records, on incident cancer arising within specified geographic regions across the nation. For this POC study, a random sample of eligible NSCLC SEER patients was selected after stratification by registry, sex and race/ethnicity. To increase precision among minority groups, African Americans, Hispanics, Asian Pacific Islanders (APIs) and American Indians/Native Alaskans (AI/NA) were oversampled. Using survey instruments developed for the POC study, trained abstractors at each registry reviewed medical records and treating physicians were queried. Data were collected at least one year post-diagnosis and included demographics, diagnostics, staging, tumor characteristics and treatment. For more

details see [S1 Methods](#). Each SEER registry obtained institutional review board approval prior to initiating the POC study.

## Study population

Patients were eligible for the POC study if they were diagnosed in 2010 with invasive, histologically-confirmed, primary NSCLC [International Classification of Diseases for Oncology, 3rd Edition (ICD-O3): C34.X and 8000–8040, 8046–8671 and 8940–8941]. Patients were not eligible if they had a history of cancer, except non-melanoma skin cancer, were simultaneously diagnosed with more than one cancer within 60 days, were diagnosed at autopsy or via death certificate only or were younger than 20 years at diagnosis. For the current analyses, patients with neuroendocrine carcinoma, not otherwise specified (ICD-O3: 8246;  $n = 25$ ) and patients with unknown tumor stage ( $n = 22$ ) were also excluded.

## Statistical analysis

To obtain estimates that reflected all eligible NSCLCs diagnosed within the SEER program in 2010, sample weights, defined as the inverse of the sampling proportion for each sampling stratum, were applied. To account for the sample design, all analyses were performed using SAS (version 9.3; SAS Institute Inc., Cary, NC) and SAS-callable SUDAAN (version 10.0.1; Research Triangle Institute, Research Triangle Park, NC).

The weighted percentages of patients who had *EGFR* testing or received erlotinib were calculated among all patients combined and stratified by tumor characteristics (stage, histology and *EGFR* status). Due to the infrequency of *EGFR* testing and administration of erlotinib among patients with non-metastatic disease (stage I-III), subsequent analyses excluded these patients. Among stage IV patients, factors associated with *EGFR* testing and erlotinib treatment were assessed separately. Variables that were associated with either outcome ( $p < 0.10$ ) based on bivariate Chi-square tests were included in a multivariate logistic model and were retained if they remained significant. The weighted percentage of stage IV patients with *EGFR* mutations was also calculated overall and stratified by race/ethnicity and histology. Finally, whether or not *EGFR* mutation status and/or receipt of erlotinib were associated with all-cause mortality was assessed by constructing a multivariate Cox proportional hazards regression model. Follow-up began on the first day of the month of cancer diagnosis; exact diagnosis date was not available. Survival was calculated through the date of death, date of last contact or December 31, 2011, whichever came first. *EGFR* mutations are known to be more common in adenocarcinomas; therefore, sensitivity analyses were also conducted excluding all non-adenocarcinoma patients. All tests were two sided and statistical significance was assessed using an alpha of 0.05.

## Results

### Patient demographics and characteristics

This study included 1,358 NSCLC patients. The mean age was 67.7 years and 74.6% of patients were over 60 years ([Table 1](#)). 54.6% were male and 73.8% were non-Hispanic white. Most patients (82.4%) were smokers and had adenocarcinomas (50.5%). According to the American Joint Committee on Cancer 7th edition (AJCC-7), 26.5% were stage I-II, 18.2% were stage III and 55.3% were stage IV.

### Frequency of EGFR testing

Overall 16.8% of NSCLC patients underwent *EGFR* testing ([Table 2](#)). When stratified by histology, the frequency of *EGFR* testing ranged from 2.7% among large cell tumors to 20.8% among

**Table 1. Demographics and characteristics among sampled patients diagnosed in 2010 with non-small cell lung cancer, Patterns of Care.**

| Characteristics                             | Total                    |                |
|---------------------------------------------|--------------------------|----------------|
|                                             | (N <sup>1</sup> = 1,358) |                |
|                                             | N <sup>1</sup>           | % <sup>2</sup> |
| Age at diagnosis                            |                          |                |
| <50                                         | 125                      | 6.3            |
| 50–59                                       | 287                      | 19.1           |
| 60–69                                       | 396                      | 30.4           |
| 70–79                                       | 354                      | 27.8           |
| 80+                                         | 196                      | 16.4           |
| Mean (standard error)                       | 67.7 (0.5)               |                |
| Sex                                         |                          |                |
| Male                                        | 690                      | 54.6           |
| Female                                      | 668                      | 45.4           |
| Race/Ethnicity                              |                          |                |
| Non-Hispanic white                          | 369                      | 73.8           |
| Non-Hispanic black                          | 346                      | 11.3           |
| Hispanic                                    | 280                      | 6.9            |
| API                                         | 302                      | 7.7            |
| AI/AN                                       | 61                       | 0.3            |
| Ever Smoker                                 |                          |                |
| No                                          | 251                      | 12.0           |
| Yes                                         | 1036                     | 82.4           |
| Unknown                                     | 71                       | 5.6            |
| Histology                                   |                          |                |
| Adenocarcinoma                              | 754                      | 50.5           |
| Squamous cell                               | 331                      | 27.8           |
| Large cell                                  | 56                       | 4.7            |
| Other/not specified                         | 217                      | 17.0           |
| Stage, AJCC7                                |                          |                |
| I -II                                       | 339                      | 26.5           |
| III                                         | 255                      | 18.2           |
| IV                                          | 764                      | 55.3           |
| Charleson comorbidity index                 |                          |                |
| 0                                           | 621                      | 40.7           |
| 1+                                          | 737                      | 59.3           |
| Died within 2 months of diagnosis           |                          |                |
| No                                          | 1064                     | 78.8           |
| Yes                                         | 294                      | 21.2           |
| Hospital bed size                           |                          |                |
| < 200 beds, out patient only, unknown       | 282                      | 25.2           |
| 200–299 beds                                | 263                      | 18.0           |
| 300–399 beds                                | 311                      | 24.3           |
| 400+ beds                                   | 502                      | 32.5           |
| Hospital type                               |                          |                |
| Government, non-federal and federal/unknown | 289                      | 20.3           |
| Non-government, not-for-profit              | 983                      | 73.2           |

(Continued)

Table 1. (Continued)

| Characteristics                     | Total<br>(N <sup>1</sup> = 1,358) |                |
|-------------------------------------|-----------------------------------|----------------|
|                                     | N <sup>1</sup>                    | % <sup>2</sup> |
| Non-government, for-profit          | 86                                | 6.5            |
| Approved residency training program |                                   |                |
| No/Unknown                          | 572                               | 51.0           |
| Yes                                 | 786                               | 49.0           |

AI/NA: American Indians/Native Alaskans; AJCC7: American Joint Committee on Cancer 7th edition; API: Asian Pacific Islander;

<sup>1</sup> Unweighted total sample size;

<sup>2</sup> Weighted percentage

doi:10.1371/journal.pone.0156728.t001

adenocarcinomas. EGFR testing tended to be more likely among patients with stage IV disease (all histologies: 19.9%; adenocarcinomas: 22.6%) but variations across stage did not tend to be statistically significant.

### Frequency of erlotinib treatment

Erlotinib was administered to 6.3% of all NSCLC patients, 33.6% of patients with EGFR-mutant tumors, 5.9% of patients with EGFR-wild type tumors and 4.8% of patients with unknown EGFR-mutant status (Table 2). The receipt of erlotinib, increased significantly with stage among all patients (stage I-II: 0.4%; stage III: 6.2%; stage IV: 9.2%; p<0.01), among patients with EGFR-mutant tumors (stage I-II: 0.6%; stage III: 21.8%; stage IV: 48.3%; p<0.01) and among patients with tumors of unknown EGFR status (stage I-II: 0.4%; stage III: 5.2%; stage IV: 6.9%; p<0.01).

Table 2. Frequency of EGFR testing and receipt of erlotinib among non-small cell lung cancer patients diagnosed in 2010 overall and by tumor stage, Patterns of Care.

|                                  | Total<br>% <sup>1</sup> | Stage I-II<br>% <sup>1</sup> | Stage III<br>% <sup>1</sup> | Stage IV<br>% <sup>1</sup> | p <sup>2</sup> |
|----------------------------------|-------------------------|------------------------------|-----------------------------|----------------------------|----------------|
| Frequency of EGFR testing        |                         |                              |                             |                            |                |
| All tumors                       | 16.8                    | 13.9                         | 11.4                        | 19.9                       | 0.08           |
| Adenocarcinoma                   | 20.8                    | 14.4                         | 22.2                        | 22.6                       | 0.23           |
| Squamous cell                    | 12.1                    | 19.6                         | 5.1                         | 10.3                       | 0.22           |
| Large cell                       | 2.7                     | 0                            | 7.1                         | 1.3                        | 0.28*          |
| Other/not specified              | 16.7                    | 1.4                          | 6.4                         | 26.4                       | <0.01          |
| Frequency of erlotinib treatment |                         |                              |                             |                            |                |
| All tumors                       | 6.3                     | 0.4                          | 6.2                         | 9.2                        | <0.01          |
| EGFR-mutant                      | 33.6                    | 0.6                          | 21.8                        | 48.3                       | <0.01          |
| EGFR-wild type                   | 5.9                     | 0.0                          | 5.9                         | 8.4                        | 0.44*          |
| EGFR status unknown              | 4.8                     | 0.4                          | 5.2                         | 6.9                        | <0.01          |

EGFR: epidermal growth factor receptor;

<sup>1</sup> Weighted percentage;

<sup>2</sup> Bivariate Chi-square test across all tumor stage or \*between stage III and stage IV

doi:10.1371/journal.pone.0156728.t002

## Determinants of EGFR testing

Among patients with stage IV disease, bivariate analyses indicated that *EGFR* testing was associated with younger age, Hispanic and API heritages, being married, having private/military/other insurance, being a non-smoker, having adenocarcinoma or other/non-specified carcinoma, having no comorbidities and living at least two months after cancer diagnosis (Table 3). Although the likelihood of *EGFR* testing decreased with age, in comparison to patients less than 50 years, multivariate modeling indicated that testing was significantly lower only among patients aged 50–59 [odds ratio (OR): 0.24; 95% confidence interval (CI): 0.08–0.69] and 80 years or older (OR: 0.21; 95% CI: 0.06–0.69). *EGFR* testing was also less likely among patients with any Medicaid or no/unknown insurance compared to those with private/military/other insurance (OR range: 0.15–0.20), among patients with large cell tumors compared to those with adenocarcinomas (OR: 0.04; 95% CI: 0.01–0.23), among patients who had comorbidities (OR: 0.33; 95% CI: 0.16–0.68) and patients who died within two months of their cancer diagnosis (OR: 0.24; 95% CI: 0.08–0.73). Additionally, *EGFR* testing was significantly more likely among Hispanics compared to Non-Hispanic whites (OR: 2.54; 95% CI: 1.28–5.03). Among patients with stage IV adenocarcinomas, *EGFR* testing remained significantly more likely among Hispanics, patients with private/military/other insurance and patients with no comorbidities.

## Frequency of EGFR mutations

Overall 30.4% of the patients with stage IV tumors who underwent *EGFR* testing were found to have an *EGFR* mutation (data not shown). When stratified by race/ethnicity, *EGFR* mutations were least common among non-Hispanic whites (21.2%) compared to Non-Hispanic blacks (42.5%), APIs (49.0%) and Hispanic patients (50.1%). *EGFR* mutations were also more common in adenocarcinomas (35.7%) than squamous cell tumors (9.9%) and tumors of other histology (22.4%).

## Determinants of erlotinib treatment

Among patients with stage IV disease, treatment with erlotinib was associated with Hispanic and API heritages, not smoking, having an adenocarcinoma, having an *EGFR* mutation, living at least two months after cancer diagnosis and being treated at a larger hospital (Table 4). Multivariate analysis indicated that erlotinib treatment was significantly less likely among smokers compared to non-smokers (OR: 0.27; 95% CI: 0.12–0.59) and patients with other/not specified NSCLC histologies compared to patients with adenocarcinoma (OR: 0.14; 95% CI: 0.04–0.54) and more likely among patients with *EGFR* mutations (OR: 9.90; 95% CI: 3.04–32.24). Among patients with stage IV adenocarcinomas, receipt of erlotinib remained significantly lower among smokers and higher among patients with *EGFR* mutations. Residence in a higher median income area was also significantly associated with receipt of erlotinib. Of patients who received erlotinib, 87.0% of patients with *EGFR*-mutant tumors started erlotinib as their first-line therapy compared to 36.2% of patients with *EGFR* wild-type tumors (data not shown).

## Survival

Among patients with stage IV disease, *EGFR*-mutant tumors and treatment with erlotinib were both associated with better survival during bivariate analyses (Table 5). However, in multivariate analyses, neither retained survival significance. Among patients with stage IV adenocarcinomas, patients with *EGFR*-mutant tumors had a better survival [Hazard Ratio (HR): 0.43; 95% CI: 0.24–0.76]; again, receipt of erlotinib was not associated with survival.

**Table 3. Factors associated with EGFR testing among patients diagnosed in 2010 with stage IV non-small cell lung cancer, Patterns of Care.**

| Characteristic                        | All            |                |                 |                 |                  | Adenocarcinoma |                |                 |                 |                  |
|---------------------------------------|----------------|----------------|-----------------|-----------------|------------------|----------------|----------------|-----------------|-----------------|------------------|
|                                       | N <sup>1</sup> | % <sup>2</sup> | p <sup>3</sup>  | OR <sup>4</sup> | 95% CI           | N <sup>1</sup> | % <sup>2</sup> | p <sup>3</sup>  | OR <sup>4</sup> | 95% CI           |
| Overall                               | 764            | 19.9           |                 |                 |                  | 476            | 22.6           |                 |                 |                  |
| Age at diagnosis                      |                |                |                 |                 |                  |                |                |                 |                 |                  |
| <50                                   | 74             | 43.7           | 0.08            | 1.00            | ref              | 47             | 55.3           | 0.16            |                 |                  |
| 50–59                                 | 176            | 16.6           |                 | <b>0.24</b>     | <b>0.08–0.69</b> | 126            | 20.8           |                 |                 |                  |
| 60–69                                 | 212            | 24.0           |                 | 0.49            | 0.18–1.33        | 131            | 22.9           |                 |                 |                  |
| 70–79                                 | 191            | 16.7           |                 | 0.39            | 0.15–1.05        | 112            | 19.6           |                 |                 |                  |
| 80+                                   | 111            | 12.3           |                 | <b>0.21</b>     | <b>0.06–0.69</b> | 60             | 13.7           |                 |                 |                  |
| Sex                                   |                |                |                 |                 |                  |                |                |                 |                 |                  |
| Male                                  | 420            | 19.8           | 0.95            |                 |                  | 238            | 25.0           | 0.51            |                 |                  |
| Female                                | 344            | 20.1           |                 |                 |                  | 238            | 20.5           |                 |                 |                  |
| Race/Ethnicity                        |                |                |                 |                 |                  |                |                |                 |                 |                  |
| Non-Hispanic white                    | 197            | 19.1           | <b>&lt;0.01</b> | 1.00            | ref              | 116            | 20.7           | <b>0.02</b>     | 1.00            | ref              |
| Non-Hispanic black                    | 184            | 12.5           |                 | 0.55            | 0.26–1.15        | 119            | 17.3           |                 | 1.05            | 0.48–2.30        |
| Hispanic                              | 167            | 30.1           |                 | <b>2.54</b>     | <b>1.28–5.03</b> | 95             | 37.8           |                 | <b>2.88</b>     | <b>1.30–6.37</b> |
| API                                   | 185            | 27.1           |                 | 1.68            | 0.78–3.56        | 129            | 31.9           |                 | 1.89            | 0.82–4.38        |
| AI/AN                                 | 31             | 12.6           |                 | 0.63            | 0.12–3.41        | 17             | 12.2           |                 | 0.54            | 0.06–4.63        |
| Marital Status                        |                |                |                 |                 |                  |                |                |                 |                 |                  |
| Married/Living as                     | 354            | 25.6           | <b>0.05</b>     |                 |                  | 216            | 30.2           | 0.06            |                 |                  |
| Other                                 | 410            | 15.6           |                 |                 |                  | 260            | 18.3           |                 |                 |                  |
| Median income, \$ <sup>5</sup>        |                |                |                 |                 |                  |                |                |                 |                 |                  |
| >62,000                               | 220            | 25.0           | 0.39            |                 |                  | 142            | 33.7           | <b>0.05</b>     |                 |                  |
| 43,000–62,000                         | 248            | 18.5           |                 |                 |                  | 170            | 19.5           |                 |                 |                  |
| < 43,000                              | 296            | 16.5           |                 |                 |                  | 164            | 15.5           |                 |                 |                  |
| Insurance                             |                |                |                 |                 |                  |                |                |                 |                 |                  |
| Private/Military/Other                | 417            | 24.6           | <b>&lt;0.01</b> | 1.00            | ref              | 271            | 29.7           | <b>0.01</b>     | 1.00            | ref              |
| Medicare only                         | 114            | 18.4           |                 | 0.89            | 0.38–2.06        | 58             | 14.1           |                 | 0.57            | 0.21–1.51        |
| Any Medicaid                          | 180            | 8.2            |                 | <b>0.20</b>     | <b>0.10–0.39</b> | 113            | 10.0           |                 | <b>0.23</b>     | <b>0.11–0.45</b> |
| None/unknown                          | 53             | 8.9            |                 | <b>0.15</b>     | <b>0.04–0.50</b> | 34             | 11.3           |                 | <b>0.18</b>     | <b>0.05–0.61</b> |
| Ever Smoker                           |                |                |                 |                 |                  |                |                |                 |                 |                  |
| No                                    | 158            | 36.2           | <b>0.04</b>     |                 |                  | 121            | 39.2           | 0.06            |                 |                  |
| Yes                                   | 570            | 16.5           |                 |                 |                  | 334            | 17.5           |                 |                 |                  |
| Unknown                               | 36             | 33.1           |                 |                 |                  | 21             | 40.5           |                 |                 |                  |
| Histology                             |                |                |                 |                 |                  |                |                |                 |                 |                  |
| Adenocarcinoma                        | 476            | 22.6           | <b>&lt;0.01</b> | 1.00            | ref              |                |                |                 |                 |                  |
| Squamous cell                         | 123            | 10.3           |                 | 0.47            | 0.13–4.68        |                |                |                 |                 |                  |
| Large cell                            | 37             | 1.3            |                 | <b>0.04</b>     | <b>0.01–0.23</b> |                |                |                 |                 |                  |
| Other/not specified                   | 128            | 26.4           |                 | 1.15            | 0.51–2.62        |                |                |                 |                 |                  |
| Charlson comorbidity index            |                |                |                 |                 |                  |                |                |                 |                 |                  |
| 0                                     | 367            | 29.6           | <b>&lt;0.01</b> | 1.00            | ref              | 232            | 34.6           | <b>&lt;0.01</b> | 1.00            | ref              |
| 1+                                    | 397            | 11.9           |                 | <b>0.33</b>     | <b>0.16–0.68</b> | 244            | 12.2           |                 | <b>0.26</b>     | <b>0.12–0.58</b> |
| Died within 2 months of diagnosis     |                |                |                 |                 |                  |                |                |                 |                 |                  |
| No                                    | 511            | 26.2           | <b>&lt;0.01</b> | 1.00            | ref              | 339            | 28.3           | <b>&lt;0.01</b> |                 |                  |
| Yes                                   | 253            | 6.4            |                 | <b>0.24</b>     | <b>0.08–0.73</b> | 137            | 8.3            |                 |                 |                  |
| Hospital bed size                     |                |                |                 |                 |                  |                |                |                 |                 |                  |
| < 200 beds, out patient only, unknown | 165            | 20.0           | 0.72            |                 |                  | 98             | 29.2           | 0.73            |                 |                  |
| 200–299 beds                          | 156            | 24.1           |                 |                 |                  | 101            | 21.8           |                 |                 |                  |

(Continued)



Table 3. (Continued)

| Characteristic                              | All            |                |                |                 |        | Adenocarcinoma |                |                |                 |        |
|---------------------------------------------|----------------|----------------|----------------|-----------------|--------|----------------|----------------|----------------|-----------------|--------|
|                                             | N <sup>1</sup> | % <sup>2</sup> | p <sup>3</sup> | OR <sup>4</sup> | 95% CI | N <sup>1</sup> | % <sup>2</sup> | p <sup>3</sup> | OR <sup>4</sup> | 95% CI |
| 300–399 beds                                | 179            | 15.7           |                |                 |        | 107            | 20.9           |                |                 |        |
| 400+ beds                                   | 264            | 20.8           |                |                 |        | 170            | 17.8           |                |                 |        |
| Hospital type                               |                |                |                |                 |        |                |                |                |                 |        |
| Government, non-federal and federal/unknown | 177            | 26.9           | 0.33           |                 |        | 110            | 28.0           | 0.67           |                 |        |
| Non-government, not-for-profit              | 536            | 18.0           |                |                 |        | 334            | 21.0           |                |                 |        |
| Non-government, for-profit                  | 51             | 17.8           |                |                 |        | 32             | 23.5           |                |                 |        |
| Approved residency training program         |                |                |                |                 |        |                |                |                |                 |        |
| No/Unknown                                  | 341            | 16.0           | 0.10           |                 |        | 204            | 20.5           | 0.43           |                 |        |
| Yes                                         | 423            | 24.4           |                |                 |        | 272            | 25.5           |                |                 |        |

AI/NA: American Indians/Native Alaskans; API: Asian Pacific Islander; CI: confidence interval; EGFR: epidermal growth factor receptor; OR: odds ratio.

<sup>1</sup> Unweighted total sample size.

<sup>2</sup> Weighted percentage that had the test (test positive; test negative; test performed, result unknown)

<sup>3</sup> Bivariate Chi-square test. \*When Large cell/Other was combined with Carcinoma, NOS

<sup>4</sup> Logistic regression model adjusting for all variables that were  $\leq 0.10$  during univariate analysis and remained significant  $\leq 0.05$  in multivariate analyses.

<sup>5</sup> Based on aggregate data at the census tract level, Census 2000; tertile cut points based on overall weighted distribution.

doi:10.1371/journal.pone.0156728.t003

## Discussion

This study establishes the general population-based patterns of *EGFR* mutation testing and treatment with erlotinib for NSCLC in the United States in 2010. An estimated 16.8% of all newly diagnosed NSCLC patients underwent *EGFR* mutation testing. Among patients with stage IV tumors, *EGFR* testing varied significantly by age, insurance and comorbidity level. Furthermore, an estimated 33.6% of NSCLC patients with *EGFR*-mutant tumors received erlotinib, which was also administered to 5.9% of NSCLC patients with *EGFR*-wild type tumors. Among patients with stage IV tumors, erlotinib treatment was less likely among smokers and patients with non-adenocarcinomas. *EGFR*-mutation was associated with improved survival, albeit only among stage IV adenocarcinomas.

The reason why a large proportion of patients with stage IV disease in the current study were not assessed for *EGFR* mutations is likely multifactorial. For example, assay costs and issues related to tissue acquisition and turnaround time may have contributed to the low testing rate [20,21]. Additionally, and maybe more importantly, professional guidelines did not recommend routine testing for *EGFR* mutations until 2011 [11–13]. However, given that the benefit of *EGFR*-directed therapy in selected patients was recognized well before professional societies formally recommended testing, it was still surprising that less than a quarter of the patients underwent *EGFR* testing in 2010.

More concerning is our finding of significant disparities in *EGFR* mutation testing. In addition to observing variations by health insurance status, comorbidity and older age were associated with significantly lower *EGFR* mutation testing rates. Although aggregate residential income level was not associated with *EGFR* testing rates, it cannot be ruled out that the association with insurance status may at least partially be due to confounded by unmeasured variations in patient-level variables (e.g., income and education). The observed variations in *EGFR* testing rates by insurance status may also reflect the fact that professional guidelines, which can impact insurance coverage policy, had yet to recommend routine *EGFR* testing by 2010. It is worth noting however that previous POC analyses have indicated that patients with



**Table 4. Factors associated with receipt of Erlotinib among patients diagnosed in 2010 with stage IV non-small cell lung cancer, Patterns of Care.**

| Characteristic                                       | All            |                |                 |                 |                   | Adenocarcinoma |                |                 |                 |                   |
|------------------------------------------------------|----------------|----------------|-----------------|-----------------|-------------------|----------------|----------------|-----------------|-----------------|-------------------|
|                                                      | N <sup>1</sup> | % <sup>2</sup> | p <sup>3</sup>  | OR <sup>4</sup> | 95% CI            | N <sup>1</sup> | % <sup>2</sup> | p <sup>3</sup>  | OR <sup>4</sup> | 95% CI            |
| Overall                                              | 764            | 9.2            |                 |                 |                   | 476            | 12.4           |                 |                 |                   |
| Age at diagnosis                                     |                |                |                 |                 |                   |                |                |                 |                 |                   |
| <50                                                  | 74             | 16.4           | 0.41            |                 |                   | 47             | 23.5           | 0.26            |                 |                   |
| 50–59                                                | 176            | 5.7            |                 |                 |                   | 126            | 7.0            |                 |                 |                   |
| 60–69                                                | 212            | 10.4           |                 |                 |                   | 131            | 13.3           |                 |                 |                   |
| 70–79                                                | 191            | 7.4            |                 |                 |                   | 112            | 9.3            |                 |                 |                   |
| 80+                                                  | 111            | 11.6           |                 |                 |                   | 60             | 19.1           |                 |                 |                   |
| Sex                                                  |                |                |                 |                 |                   |                |                |                 |                 |                   |
| Male                                                 | 420            | 8.3            | 0.53            |                 |                   | 238            | 11.2           | 0.63            |                 |                   |
| Female                                               | 344            | 10.2           |                 |                 |                   | 238            | 13.5           |                 |                 |                   |
| Race/Ethnicity                                       |                |                |                 |                 |                   |                |                |                 |                 |                   |
| Non-Hispanic white                                   | 197            | 6.7            | <b>&lt;0.01</b> |                 |                   | 116            | 9.7            | 0.06            |                 |                   |
| Non-Hispanic black                                   | 184            | 9.6            |                 |                 |                   | 119            | 11.3           |                 |                 |                   |
| Hispanic                                             | 167            | 16.2           |                 |                 |                   | 95             | 23.2           |                 |                 |                   |
| API                                                  | 185            | 23.1           |                 |                 |                   | 129            | 25.5           |                 |                 |                   |
| AI/AN                                                | 31             | 8.9            |                 |                 |                   | 17             | 11.6           |                 |                 |                   |
| Marital Status                                       |                |                |                 |                 |                   |                |                |                 |                 |                   |
| Married/Living as                                    | 354            | 9.7            | 0.74            |                 |                   | 216            | 12.8           | 0.88            |                 |                   |
| Other                                                | 410            | 8.7            |                 |                 |                   | 260            | 12.2           |                 |                 |                   |
| Median income, \$ <sup>5</sup>                       |                |                |                 |                 |                   |                |                |                 |                 |                   |
| >62,000                                              | 220            | 14.7           | 0.11            |                 |                   | 142            | 24.7           | <b>0.02</b>     | 1.00            | ref               |
| 43,000–62,000                                        | 248            | 7.0            |                 |                 |                   | 170            | 7.1            |                 | <b>0.30</b>     | <b>0.11–0.83</b>  |
| < 43,000                                             | 296            | 6.0            |                 |                 |                   | 164            | 6.7            |                 | <b>0.34</b>     | <b>0.13–0.91</b>  |
| Percentage with a high school education <sup>5</sup> |                |                |                 |                 |                   |                |                |                 |                 |                   |
| >89%                                                 | 331            | 7.1            | 0.15            |                 |                   | 206            | 9.2            | 0.06            |                 |                   |
| 77–89%                                               | 221            | 5.9            |                 |                 |                   | 147            | 7.0            |                 |                 |                   |
| <77%                                                 | 212            | 13.9           |                 |                 |                   | 129            | 20.9           |                 |                 |                   |
| Insurance                                            |                |                |                 |                 |                   |                |                |                 |                 |                   |
| Private/Military/Other                               | 417            | 11.5           | 0.07            |                 |                   | 271            | 16.4           | 0.06            |                 |                   |
| Medicare only                                        | 114            | 3.7            |                 |                 |                   | 58             | 5.1            |                 |                 |                   |
| Any Medicaid                                         | 180            | 6.9            |                 |                 |                   | 113            | 5.7            |                 |                 |                   |
| None/unknown                                         | 53             | 7.9            |                 |                 |                   | 34             | 10.3           |                 |                 |                   |
| Ever Smoker                                          |                |                |                 |                 |                   |                |                |                 |                 |                   |
| No                                                   | 158            | 23.8           | <b>&lt;0.01</b> | 1.00            | ref               | 121            | 24.8           | <b>&lt;0.01</b> | 1.00            | ref               |
| Yes                                                  | 570            | 5.9            |                 | <b>0.27</b>     | <b>0.12–0.59</b>  | 334            | 7.5            |                 | <b>0.31</b>     | <b>0.13–0.73</b>  |
| Unknown                                              | 36             | 24.8           |                 | 1.93            | 0.26–14.53        | 21             | 44.0           |                 | 2.95            | 0.43–20.09        |
| Histology                                            |                |                |                 |                 |                   |                |                |                 |                 |                   |
| Adenocarcinoma                                       | 476            | 12.4           | <b>&lt;0.01</b> | 1.00            | ref               |                |                |                 |                 |                   |
| Squamous cell                                        | 123            | 5.9            |                 | 0.70            | 0.19–2.52         |                |                |                 |                 |                   |
| Large cell                                           | 37             | 8.7            |                 | 1.08            | 0.15–8.09         |                |                |                 |                 |                   |
| Other/not specified                                  | 128            | 2.0            |                 | <b>0.14</b>     | <b>0.04–0.54</b>  |                |                |                 |                 |                   |
| EGFR mutation                                        |                |                |                 |                 |                   |                |                |                 |                 |                   |
| Negative                                             | 84             | 8.4            | <b>&lt;0.01</b> | 1.00            | ref               | 63             | 10.3           | <b>0.01</b>     | 1.00            | ref               |
| Positive                                             | 68             | 48.3           |                 | <b>9.90</b>     | <b>3.04–32.24</b> | 54             | 58.3           |                 | <b>14.46</b>    | <b>3.59–58.22</b> |
| Unknown                                              | 612            | 6.9            |                 | 0.72            | 0.27–1.93         | 359            | 9.0            |                 | 0.89            | 0.24–3.48         |
| Charlson comorbidity index                           |                |                |                 |                 |                   |                |                |                 |                 |                   |

(Continued)

Table 4. (Continued)

| Characteristic                              | All            |                |                |                 |        | Adenocarcinoma |                |                |                 |        |
|---------------------------------------------|----------------|----------------|----------------|-----------------|--------|----------------|----------------|----------------|-----------------|--------|
|                                             | N <sup>1</sup> | % <sup>2</sup> | p <sup>3</sup> | OR <sup>4</sup> | 95% CI | N <sup>1</sup> | % <sup>2</sup> | p <sup>3</sup> | OR <sup>4</sup> | 95% CI |
| 0                                           | 367            | 11.9           | 0.13           |                 |        | 232            | 16.1           | 0.18           |                 |        |
| 1+                                          | 397            | 6.9            |                |                 |        | 244            | 9.1            |                |                 |        |
| Died within 2 months of diagnosis           |                |                |                |                 |        |                |                |                |                 |        |
| No                                          | 511            | 11.5           | <b>0.03</b>    |                 |        | 339            | 14.2           | 0.27           |                 |        |
| Yes                                         | 253            | 4.1            |                |                 |        | 137            | 7.8            |                |                 |        |
| Hospital bed size                           |                |                |                |                 |        |                |                |                |                 |        |
| < 200 beds, out patient only, unknown       | 165            | 8.6            | <b>0.04</b>    |                 |        | 98             | 8.7            | <b>0.05</b>    |                 |        |
| 200–299 beds                                | 156            | 13.4           |                |                 |        | 101            | 18.4           |                |                 |        |
| 300–399 beds                                | 179            | 4.3            |                |                 |        | 107            | 6.4            |                |                 |        |
| 400+ beds                                   | 264            | 11.1           |                |                 |        | 170            | 16.3           |                |                 |        |
| Hospital type                               |                |                |                |                 |        |                |                |                |                 |        |
| Government, non-federal and federal/unknown | 177            | 7.6            | 0.48           |                 |        | 110            | 11.9           | 0.73           |                 |        |
| Non-government, not-for-profit              | 536            | 8.1            |                |                 |        | 334            | 11.1           |                |                 |        |
| Non-government, for-profit                  | 51             | 25.5           |                |                 |        | 32             | 26.4           |                |                 |        |
| Approved residency training program         |                |                |                |                 |        |                |                |                |                 |        |
| No/Unknown                                  | 341            | 9.0            | 0.90           |                 |        | 204            | 10.5           | 0.30           |                 |        |
| Yes                                         | 423            | 9.4            |                |                 |        | 272            | 15.0           |                |                 |        |

AI/NA: American Indians/Native Alaskans; API: Asian Pacific Islander; CI: confidence interval; OR: odds ratio.

<sup>1</sup> Unweighted total sample size.

<sup>2</sup> Weighted percentage that received Erlotinib.

<sup>3</sup> Bivariate Chi-square test.

<sup>4</sup> Logistic regression model adjusting for all variables that were  $\leq 0.10$  during univariate analysis and remained significant  $\leq 0.05$  in multivariate analyses.

<sup>5</sup> Based on aggregate data at the census tract level, Census 2000; tertile cut points based on overall weighted distribution.

doi:10.1371/journal.pone.0156728.t004

Table 5. Association between EGFR-mutant status and Erlotinib treatment with all-cause survival among patients diagnosed in 2010 with stage IV non-small cell lung cancer, Patterns of Care.

|               | All            |                  |                 |                 |                  | Adenocarcinoma |                  |                 |                 |                  |
|---------------|----------------|------------------|-----------------|-----------------|------------------|----------------|------------------|-----------------|-----------------|------------------|
|               | N <sup>1</sup> | (%) <sup>2</sup> | p <sup>3</sup>  | HR <sup>4</sup> | 95% CI           | N <sup>1</sup> | (%) <sup>2</sup> | p <sup>3</sup>  | HR <sup>4</sup> | 95% CI           |
| EGFR mutation |                |                  |                 |                 |                  |                |                  |                 |                 |                  |
| Negative      | 84             | 66.3             | <b>&lt;0.01</b> | 1.00            | ref              | 63             | 73.0             | <b>&lt;0.01</b> | 1.00            | ref              |
| Positive      | 68             | 45.6             |                 | 0.64            | 0.35–1.18        | 54             | 32.1             |                 | <b>0.43</b>     | <b>0.24–0.76</b> |
| Unknown       | 612            | 86.0             |                 | <b>1.59</b>     | <b>1.18–2.14</b> | 365            | 81.6             |                 | 1.06            | 0.71–1.58        |
| Erlotinib     |                |                  |                 |                 |                  |                |                  |                 |                 |                  |
| No, unknown   | 662            | 83.6             | <b>0.01</b>     | 1.00            | ref              | 401            | 79.7             | <b>0.04</b>     | 1.00            | ref              |
| Yes           | 102            | 63.0             |                 | 0.69            | 0.47–1.02        | 81             | 60.2             |                 | 0.69            | 0.47–1.03        |

EGFR: epidermal growth factor receptor; CI: confidence interval; HR: hazard ratio.

<sup>1</sup> Unweighted total sample size.

<sup>2</sup> Weighted percentage of patients who had died as of December 31, 2011.

<sup>3</sup> Bivariate Chi-square test by vital status as of December 31, 2011.

<sup>4</sup> Hazard ratio from Cox proportional hazard model adjusting for age, sex, race/ethnicity, marital status, residential income level, insurance status, ever smoking status, Charlson comorbidity index, EGFR status, receipt of Erlotinib, surgery, radiotherapy, other systemic therapy, and hospital characteristics (bed size, classification, residency program)

doi:10.1371/journal.pone.0156728.t005

Medicaid or Medicare-only are often under treated [22]; thus, our results may extend these findings to the realm of molecular testing. Given the manageable toxicity profile and higher efficacy compared with chemotherapy, EGFR TKIs are recommended in patients with tumors harboring *EGFR* sensitizing mutations regardless of their performance status [23]. Sustained, clinically relevant improvements in quality of life have been observed in patients with *EGFR*-mutant tumors after EGFR TKIs treatment compared to chemotherapy [7]. Our data indicates that in the general practice, comorbid conditions and limited life expectancy, both surrogates for poor performance status, were significant negative determinants of *EGFR* mutation testing. Although the progression-free survival benefits associated with erlotinib have not been found to vary by age, greater toxicities have been observed among older patients [24]. Therefore, the anticipation of greater toxicities with erlotinib among older patients may explain why older age was associated with a lower likelihood of *EGFR* testing.

Disparities were also observed for the receipt of erlotinib related to smoking status and possibly median residential income level. Although further studies are needed to confirm these findings, it is possible that clinicians are less inclined to administer erlotinib to smokers because smoking increases the metabolic clearance of erlotinib and, thereby, diminishes the effectiveness [25]. The finding that lower income patients were less likely to receive erlotinib may be a true indication of a cost barrier. However, this finding should be interpreted cautiously because individual income level was not available.

The incidence of *EGFR* mutation varies by race/ethnicity. Previous studies have estimated that 15–20% of white and 50–55% of API NSCLC patients have *EGFR*-mutant tumors [26–29]. The frequency of *EGFR* mutations among African American and Hispanic NSCLC patients is less clear. Possibly due to small sample sizes and heterogeneity across studies, the frequency of *EGFR*-mutant tumors among African American NSCLC patients has ranged between 2–20% [26–30]. Only one study has assessed the frequency of *EGFR*-mutant NSCLC in Hispanic patients (15%) [31]. In contrast to these previous studies, the frequency of *EGFR*-mutant tumors in this study was assessed among patients selected on the basis of clinico-pathologic characteristics (e.g., patients with adenocarcinomas and/or non-smokers were more likely to have an *EGFR* test). Thus, the observed frequencies in the current study demonstrate selective testing tends to enrich the frequency of *EGFR*-mutant tumors, particularly among non-Hispanic black and Hispanic patients. Higher than expected frequencies of *EGFR*-mutant tumors among non-Hispanic black and Hispanic patients, may be largely due to racial/ethnic variation in smoking and histology. For example, Hispanic patients were less likely to be smokers than NHW (71.1% vs. 85.4%, respectively,  $p < 0.01$ ) and Hispanic and non-Hispanic black patients were more likely to have had adenocarcinomas than NHW patients (56.7%, 57.5% and 48.5%, respectively  $p \leq 0.14$ ; data not shown).

Albeit only among patients with stage IV adenocarcinomas, we found that *EGFR*-mutant tumors were associated with better survival. This finding is consistent with previous reports in patients with advanced NSCLC, which suggest that *EGFR* mutation status by itself is a favorable prognostic marker [32,33]. Erlotinib was not independently associated with survival. However, due to the high frequency of patients in whom *EGFR* testing was not done, the small number of patients with *EGFR* mutations and the observational nature of this study, which makes it prone to confounding by indication, these results should be interpreted with caution.

To our knowledge only a limited number of prior studies have addressed the question of adoption of *EGFR* mutation testing in general practice. Based on retrospective data from the US Oncology Network data, Pan et al. estimated that 15.2% of patients with stage IV NSCLC underwent *EGFR* testing and that 50.0% of patients with stage IV *EGFR*-mutant tumors received erlotinib [34]. Our results which are based on a larger, population-based sample are consistent with these findings.

The current study also provides data on *EGFR* mutation testing and erlotinib use among patients with early-stage NSCLC, a group for which current guidelines do not recommend testing or treatment [13,26]. Interestingly, 13.9% of NSCLC patients with stage I-II disease received *EGFR* mutation testing. Notwithstanding the relatively high frequency of *EGFR* mutation testing in this population, a very low number of the patients received erlotinib. The role of adjuvant erlotinib in NSCLC remains under investigation (NCT02194738).

The strengths of this study include the population-based data, oversampled minority groups, and physician verified treatment. This study had several limitations. We were not able to assess all factors that may have influenced the decisions to have *EGFR* testing or treatment with erlotinib. For example, tumors that were classified as non-adenocarcinoma may have had an adenocarcinoma component, which may partially explain the higher than expected frequency of *EGFR* mutations among the non-adenocarcinoma categories. Additionally, we were not able to assess how testing and subsequent treatment were impacted by inadequate tissue samples and variable laboratory turnaround times. Variations by specific mutation were also not assessable because this information was not recorded. Additionally, small sample size precluded the ability to identify factors associated with *EGFR* testing and receipt of erlotinib among patients with earlier stage tumors and non-adenocarcinomas. Small sample size may also have impacted the observed mutation rate among racial subgroups. Finally, because NSCLC has not been selected as a POC study cancer site since 2010, it was not possible to assess more recent clinical practices. It is likely that *EGFR* testing frequency has increased in the recent years with it being recommended by professional societies [11,12]. Despite the limitations, we were able to examine *EGFR* testing and erlotinib use among NSCLC patients that were representative of those seen in the general clinical practice.

In conclusion, targeted therapy in molecularly selected patients is transforming lung cancer treatment. Although the current testing rates are likely substantially higher than rates reported here, the results from the current study indicate patterns of early dissemination of *EGFR* mutation testing and erlotinib treatment. The complexity of testing and treatment for lung cancer patients will likely increase as additional targets and therapies are identified. A national strategy is imperative to ensure that resources and processes are in place to more widely implement molecular testing.

## Supporting Information

### S1 Methods. Description of analysis of individual variables.

(DOC)

## Author Contributions

Conceived and designed the experiments: AT LE. Performed the experiments: LE. Analyzed the data: AT LE. Contributed reagents/materials/analysis tools: AT LE. Wrote the paper: AT LE.

## References

1. American Cancer Society. Cancer Facts & Figures 2015. Atlanta: American Cancer Society, 2015.
2. Schiller JH, Harrington D, Belani CP, Langer C, Sandler A, Krook J, et al. Comparison of four chemotherapy regimens for advanced non-small-cell lung cancer. *N Engl J Med* 2002; 346:92–98 PMID: [11784875](#)
3. Pao W, Chmielecki J. Rational, biologically based treatment of EGFR-mutant non-small-cell lung cancer. *Nature Reviews Cancer* 2010; 10:760–774. doi: [10.1038/nrc2947](#) PMID: [20966921](#)

4. Pao W, Miller V, Zakowski M, Doherty J, Politi K, Sarkaria I et al. EGFR receptor gene mutations are common in lung cancers from "never smokers" and are associated with sensitivity of tumors to gefitinib and erlotinib. *Proc Natl Acad Sci U S A* 2004; 101:13306–13311. PMID: [15329413](#)
5. Lynch TJ, Bell DW, Sordella R, Gurubhagavatula S, Okimoto RA, Brannigan BW, et al. Activating mutations in the epidermal growth factor receptor underlying responsiveness of non-small-cell lung cancer to gefitinib. *N Engl J Med* 2004; 350:2129–2139. PMID: [15118073](#)
6. Paez JG, Janne PA, Lee JC, Tracy S, Greulich H, Gabriel S, et al. EGFR mutations in lung cancer: correlation with clinical response to gefitinib therapy. *Science* 2004; 304:1497–1500. PMID: [15118125](#)
7. Mok TS, Wu YL, Thongprasert S, Yang CH, Chu DT, Saijo N, et al. Gefitinib or carboplatin-paclitaxel in pulmonary adenocarcinoma. *N Engl J Med* 2009; 361:947–957. doi: [10.1056/NEJMoa0810699](#) PMID: [19692680](#)
8. Zhou CC, Wu YL, Chen GY, Feng J, Liu XQ, Wang C, et al. Erlotinib versus chemotherapy as first-line treatment for patients with advanced EGFR mutation-positive non-small-cell lung cancer (OPTIMAL, CTONG-0802): a multicentre, open-label, randomised, phase 3 study. *Lancet Oncology* 2011; 12:735–742. doi: [10.1016/S1470-2045\(11\)70184-X](#) PMID: [21783417](#)
9. Rosell R, Carcereny E, Gervais R, Vergnenegre A, Massuti B, Felip E, et al. Erlotinib versus standard chemotherapy as first-line treatment for European patients with advanced EGFR mutation-positive non-small-cell lung cancer (EURTAC): a multicentre, open-label, randomised phase 3 trial. *Lancet Oncology* 2012; 13:239–246. doi: [10.1016/S1470-2045\(11\)70393-X](#) PMID: [22285168](#)
10. Wu YL, Zhou C, Hu CP, Feng J, Lu S, Huang Y, et al. Afatinib versus cisplatin plus gemcitabine for first-line treatment of Asian patients with advanced non-small-cell lung cancer harbouring EGFR mutations (LUX-Lung 6): an open-label, randomised phase 3 trial. *Lancet Oncology* 2014; 15:213–222. doi: [10.1016/S1470-2045\(13\)70604-1](#) PMID: [24439929](#)
11. Keedy VL, Temin S, Somerfield MR, Beasley MB, Johnson DH, McShane LM, et al. American Society of Clinical Oncology provisional clinical opinion: epidermal growth factor receptor (EGFR) Mutation testing for patients with advanced non-small-cell lung cancer considering first-line EGFR tyrosine kinase inhibitor therapy. *J Clin Oncol* 2011; 29:2121–2127. doi: [10.1200/JCO.2010.31.8923](#) PMID: [21482992](#)
12. Lindeman NI, Cagle PT, Beasley MB, Chitale DA, Dacic S, Giaccone Get al. Molecular Testing Guideline for Selection of Lung Cancer Patients for EGFR and ALK Tyrosine Kinase Inhibitors: Guideline from the College of American Pathologists, International Association for the Study of Lung Cancer, and Association for Molecular Pathology. *J Thorac Oncol* 2013; 8:1343–1343.
13. Ettinger DS, Akerley W, Borghaei H, Chang AC, Cheney RT, Chirieac LR, et al. Non-small cell lung cancer. *J Natl Compr Canc Netw* 2012; 10:1236–1271. PMID: [23054877](#)
14. Leigh NB, Rekhman N, Biermann WA, Huang J, Mino-Kenudson M, Ramalingam SS, et al. Molecular testing for selection of patients with lung cancer for epidermal growth factor receptor and anaplastic lymphoma kinase tyrosine kinase inhibitors: American Society of Clinical Oncology endorsement of the College of American Pathologists/International Association for the study of lung cancer/association for molecular pathology guideline. *J Clin Oncol* 2014; 32:3673–3679. doi: [10.1200/JCO.2014.57.3055](#) PMID: [25311215](#)
15. National Comprehensive Cancer Network. NCCN Clinical Practice Guidelines in Oncology: Non-small cell lung cancer, version 5.2015 2015.
16. Ellis PM, Verma S, Sehdev S, Younus J, Leigh NB. Challenges to implementation of an epidermal growth factor receptor testing strategy for non-small-cell lung cancer in a publicly funded health care system. *J Thorac Oncol* 2013; 8:1136–1141. doi: [10.1097/JTO.0b013e31829f6a43](#) PMID: [23887170](#)
17. Sequist LV, Joshi VA, Janne PA, Muzikansky A, Fidias P, Meyerson M, et al. Response to treatment and survival of patients with non-small cell lung cancer undergoing somatic EGFR mutation testing. *Oncologist* 2007; 12:90–98. PMID: [17285735](#)
18. Inoue A, Kobayashi K, Usui K, Maemondo M, Okinaga S, Mikami I, et al. First-Line Gefitinib for Patients With Advanced Non-Small-Cell Lung Cancer Harboring Epidermal Growth Factor Receptor Mutations Without Indication for Chemotherapy. *J Clin Oncol* 2009; 27:1394–1400. doi: [10.1200/JCO.2008.18.7658](#) PMID: [19224850](#)
19. Lynch TJ, Bell DW, Sordella R, Gurubhagavatula S, Okimoto RA, Brannigan BW, et al. Activating mutations in the epidermal growth factor receptor underlying responsiveness of non-small-cell lung cancer to gefitinib. *N Engl J Med* 2004; 350:2129–2139. PMID: [15118073](#)
20. Miller FA, Krueger P, Christensen RJ, Ahern C, Carter RF, Kamel-Reid S. Postal survey of physicians and laboratories: practices and perceptions of molecular oncology testing. *BMC Health Serv Res* 2009; 9:131. doi: [10.1186/1472-6963-9-131](#) PMID: [19643018](#)
21. Moreira AL, Thornton RH. Personalized medicine for non-small-cell lung cancer: implications of recent advances in tissue acquisition for molecular and histologic testing. *Clin Lung Cancer* 2012; 13:334–339. doi: [10.1016/j.clcc.2012.01.004](#) PMID: [22424871](#)

22. Harlan LC, Greene AL, Clegg LX, Mooney M, Stevens JL, Brown ML. Insurance status and the use of guideline therapy in the treatment of selected cancers. *J Clin Oncol* 2005; 23:9079–9088. PMID: [16301598](#)
23. Ettinger DS, Wood DE, Akerley W, Bazhenova LA, Borghaei H, Camidge DR, et al. Non-small cell lung cancer, version 1.2015. *J Natl Compr Canc Netw* 2014; 12:1738–1761. PMID: [25505215](#)
24. Wheatley-Price P, Ding K, Seymour L, Clark GM, Shepherd FA. Erlotinib for advanced non-small-cell lung cancer in the elderly: an analysis of the National Cancer Institute of Canada Clinical Trials Group Study BR.21. *J Clin Oncol* 2008; 26:2350–2357. doi: [10.1200/JCO.2007.15.2280](#) PMID: [18467727](#)
25. Hamilton M, Wolf JL, Rusk J, Beard SE, Clark GM, Witt K, et al. Effects of smoking on the pharmacokinetics of erlotinib. *Clin Cancer Res* 2006; 12:2166–2171. PMID: [16609030](#)
26. Yang SH, Mechanic LE, Yang P, Landi MT, Bowman ED, Wampfler J, et al. Mutations in the tyrosine kinase domain of the epidermal growth factor receptor in non-small cell lung cancer. *Clin Cancer Res* 2005; 11:2106–2110. PMID: [15788655](#)
27. Zhang W, McQuitty EB, Olsen R, Fan H, Hendrickson H, Tio FO, et al. EGFR mutations in US Hispanic versus non-Hispanic white patients with lung adenocarcinoma. *Arch Pathol Lab Med* 2014; 138:543–545. doi: [10.5858/arpa.2013-0311-OA](#) PMID: [23937608](#)
28. Reinersman JM, Johnson ML, Riely GJ, Chitale DA, Nicastrì AD, Soff GA, et al. Frequency of EGFR and KRAS mutations in lung adenocarcinomas in African Americans. *J Thorac Oncol* 2011; 6:28–31. doi: [10.1097/JTO.0b013e3181fb4fe2](#) PMID: [21107288](#)
29. Dogan S, Shen R, Ang DC, Johnson ML, D'Angelo SP, Paik PK, et al. Molecular epidemiology of EGFR and KRAS mutations in 3,026 lung adenocarcinomas: higher susceptibility of women to smoking-related KRAS-mutant cancers. *Clin Cancer Res* 2012; 18:6169–6177. doi: [10.1158/1078-0432.CCR-11-3265](#) PMID: [23014527](#)
30. Araujo LH, Timmers C, Bell EH, Shilo K, Lammers PE, Zhao W, et al. Genomic Characterization of Non-Small-Cell Lung Cancer in African Americans by Targeted Massively Parallel Sequencing. *J Clin Oncol* 2015; 33:1966–73. doi: [10.1200/JCO.2014.59.2444](#) PMID: [25918285](#)
31. McQuitty E, Zhang W, Hendrickson H, Tio FO, Jagirdar J, Olsen R, et al. Lung adenocarcinoma biomarker incidence in Hispanic versus non-Hispanic white patients. *Arch Pathol Lab Med* 2014; 138:390–394. doi: [10.5858/arpa.2013-0225-OA](#) PMID: [23802852](#)
32. Eberhard DA, Johnson BE, Amler LC, Goddard AD, Heldens SL, Herbst RS, et al. Mutations in the epidermal growth factor receptor and in KRAS are predictive and prognostic indicators in patients with non-small-cell lung cancer treated with chemotherapy alone and in combination with erlotinib. *J Clin Oncol* 2005; 23:5900–5909. PMID: [16043828](#)
33. Sasaki H, Shimizu S, Endo K, Takada M, Kawahara M, Tanaka H, et al. EGFR and erbB2 mutation status in Japanese lung cancer patients. *Int J Cancer* 2006; 118:180–184. PMID: [16003726](#)
34. Pan IW, Mallick R, Dhanda R, Nadler E. Treatment patterns and outcomes in patients with non-squamous advanced non-small cell lung cancer receiving second-line treatment in a community-based oncology network. *Lung Cancer* 2013; 82:469–476. PMID: [24396885](#)
